# Supplementary material
Source: publisher site journal article supplement (https://www.dovepress.com/article/179784)
Supplement: Supplementary file 1 [file get_supplementary_file.php]

**SUPPLEMENTAL TABLES LEGENDS**

**Table S1. List of Independent Ethics Committees**

The institutional ethics committees involved in the study are listed, along with their venue city.

**Table S2. The Disease Awareness in COPD Questionnaire (DACQ) structure**

Final list of the 20 selected items and respective domains; the 7 items that were removed during the selection process are not shown. The items were administered to patients in their original, Italian version: the English translation provided in the table was not linguistically validated, and it is shown only for informative purpose

**Table S3. Rasch analysis (rating scale model) - Items, location and fit statistics**

(*) correlation between item score and total measured awareness level (for each considered domain) based on the Rasch calibrated item scores and total scores.

Items are presented in descending order of expressed difficulty (according to the “Location” parameter), starting from the most arduous: as the location decreased, the patient’s level of awareness in the considered domain increased. INFIT and OUTFIT values within a 0.5–1.5 range were considered satisfactory 1; values out of the desirable range are in italic.

**Table S4. DACQ stability over time - Domains scores**

Note. The stability over time of the DACQ was evaluated by means of the Intraclass Correlation Coefficient (ICC) on 79 patients with stable disease after 6 months. According to the Shrout and Fleiss notation, the ICC (3,1) has been computed.

**Table S5. Patients' COPD awareness at enrollment stratified by patient’s age**

(*) Two-sample t-test

(**) Kruskal-Wallis test

Note. Higher scores reflect a patient's higher grade of awareness regarding his/her COPD, and vice versa. Scores were normalized, so that the final possible range is 0-100 points.

**Table S6. Patients' COPD awareness at enrollment stratified by patient’s gender**

(*) Two-sample t-test

(**) Kruskal-Wallis test

Note. Higher scores reflect a patient's higher grade of awareness regarding his/her COPD, and vice versa. Scores were normalized, so that the final possible range is 0-100 points.

**Table S7. Patients' COPD awareness at enrollment stratified by COPD severity (GOLD 2017 categories)**

(^) Parametric ANOVA (F test) was used as test for statistical significance of difference in score among groups.

The Tukey's Studentized Range Test for cases was used to evaluate which comparisons between groups were statistically significant (this test controls the Type I experimentwise error rate for multiple testing). Here below are listed the multiple comparisons that resulted to be statistically significant (i.e. with p-value<0.05; see also **Figure 2**):

(a) D vs A, D vs B and B vs A for *Disease acceptance*;

(b) no comparisons were statistically significant for *Awareness of treatment needs*;

(c) D vs A and B vs A for *Disease knowledge*;

(d) no comparisons were statistically significant for *Disease perception*;

(e) D vs A and B vs A for DACQ total score.

Note. Only two patients were classified as GOLD 2017 C grade, therefore they were excluded from the analysis because of the insufficient group size.

Note. Higher scores reflect a patient's higher grade of awareness regarding his/her COPD, and vice versa. Scores were normalized, so that the final possible range is 0-100 points.

**Table S8. Patients' COPD awareness at enrollment stratified by level of symptoms (CAT score)**

(*) Two-sample t-test; (**) Kruskal-Wallis test; see also **Figure 3**.

A higher CAT score represents a greater impact of symptoms in patient’s daily life.

Note. Higher scores reflect a patient's higher grade of awareness regarding his/her COPD, and vice versa. Scores were normalized, so that the final possible range is 0-100 points.

**SUPPLEMENTAL TABLES**

**Table S1.**

| **Independent Ethics Committees** | **City** |
| --- | --- |
| Comitato Etico Regione Liguria c/o IRCCS A.O.U. San Martino-IST | Genova |
| Comitato Etico della Provincia di Ferrara c/o A.O.U. di Ferrara | Cona di Ferrara |
| Comitato Etico Area Pavia c/o IRCCS Policlinico San Matteo | Pavia |
| Comitato Etico Milano Area A c/o A.O. L.Sacco | Milano |
| Comitato Etico Indipendente AOU Policlinico Tor Vergata (PTV) | Roma |
| Comitato Etico Centrale Fondazione IRCCS Salvatore Maugeri | Pavia |
| Comitato Etico PALERMO 2 c/o A.O.Ospedali Riuniti Villa Sofia Cervello | Palermo |
| Segreteria Scientifico-Amministrativa CEAS Umbria | Ellera di Corciano |
| Comitato Etico Area Vasta Nord Ovest c/o A.O.U. Pisana | Pisa |
| Comitato Etico Interaziendale A.S.O. SS.Antonio e Biagio e C.Arrigo | Alessandria |
| Comitato Etico Regionale delle Marche A.O.U. Ospedali Riuniti | Ancona |
| Comitato Etico Università degli Studi della Campania AOU Vanvitelli - AORN Ospedali dei Colli | Napoli |
| Comitato Etico IRCCS Istituto Tumori "Giovanni Paolo II" | Bari |
| Comitato Etico Campania Nord c/o A.O.R.N. Moscati | Avellino |
| Comitato Etico della AUSL della Valle D'Aosta | Aosta |
| Comitato Etico per le Province di L'Aquila e Teramo c/o ASL Avezzano Sulmona L'Aquila | L'Aquila |
| Comitato Etico Provinciale c/o Azienda Ospedaliera Arcispedale Santa Maria Nuova/I.R.C.C.S. | Reggio Emilia |
| CESC delle Province di Verona e Rovigo c/o AOUI Verona | Verona |
| Comitato Etico Interaziendale A.O. San Luigi Gonzaga | Orbassano |
| Comitato Etico Campania Sud c/o ASL Napoli 3 Sud | Brusciano |

**Table S2.**

| **Item**  **#** | **Item text** | **Domain** |
| --- | --- | --- |
| 01 | I need to be treated with inhaled drugs forever | *Disease knowledge* |
| 02 | I believe that COPD tends to worsen over time | *Disease knowledge* |
| 04 | A regular administration of drugs allows me to move with less effort | *Awareness of treatment needs* |
| 05 | I think that COPD is a mild disease since it is treated with inhaled drugs | *Disease perception* |
| 07 | I cannot easily accept to have COPD | *Disease acceptance* |
| 08 | Inhaled drugs are less effective than pills, tablets or other oral medications | *Disease perception* |
| 09 | Treatments for COPD must be taken regularly | *Awareness of treatment needs* |
| 10 | I prefer to ignore COPD symptoms | *Disease perception* |
| 12 | A regular therapy reduces the risk of sudden worsening | *Awareness of treatment needs* |
| 14 | Inhaled drugs help improving the fatigue in breathing | *Awareness of treatment needs* |
| 15 | I am worried about my COPD | *Disease acceptance* |
| 18 | Spirometry is a fundamental examination for the COPD diagnosis | *Awareness of treatment needs* |
| 19 | I will never heal from my COPD | *Disease knowledge* |
| 20 | I think I will never heal from my COPD because there is lack of effective drugs | *Disease perception* |
| 21 | I prefer not to think about my COPD | *Disease perception* |
| 22 | I am angry because of my COPD | *Disease acceptance* |
| 23 | Drugs for COPD improve my symptoms | *Awareness of treatment needs* |
| 24 | I am having difficulty living with COPD symptoms | *Disease acceptance* |
| 25 | I wonder why COPD happened to me | *Disease acceptance* |
| 26 | COPD is a chronic disease and it is not possible to heal from it | *Disease knowledge* |

**Table S3.**

| **Factor** | **Item #** | **Location**  **Logits (SE)** | **INFIT**  **MNSQ** | **OUTFIT**  **MNSQ** | **PT-measure**  **Corr. (*)** |
| --- | --- | --- | --- | --- | --- |
| *Disease acceptance* | **15** | 0.56 (0.08) | 0.82 | 0.82 | 0.79 |
| **7** | 0.14 (0.08) | 1.18 | 1.22 | 0.70 |
| **24** | -0.04 (0.08) | 0.75 | 0.78 | 0.78 |
| **22** | -0.08 (0.08) | 0.91 | 0.89 | 0.77 |
| **16** | -0.25 (0.08) | 0.74 | 0.72 | 0.79 |
| **25** | -0.32 (0.08) | *1.56* | *1.63* | 0.62 |
| *Awareness of*  *treatment needs* | **12** | 0.47 (0.09) | 0.85 | 0.93 | 0.62 |
| **4** | 0.44 (0.09) | 0.81 | 0.82 | 0.67 |
| **3** | 0.44 (0.09) | 1.15 | 1.12 | 0.59 |
| **14** | 0.23 (0.10) | 0.61 | 0.65 | 0.70 |
| **17** | 0.18 (0.10) | 1.35 | 1.44 | 0.51 |
| **23** | -0.01 (0.10) | 0.71 | 0.72 | 0.67 |
| **18** | -0.42 (0.11) | 1.40 | 1.42 | 0.47 |
| **9** | -1.33 (0.12) | 1.24 | 1.15 | 0.43 |
| *Disease knowledge* | **2** | 1.50 (0.09) | 1.19 | 1.29 | 0.70 |
| **1** | -0.44 (0.10) | 1.14 | 1.11 | 0.65 |
| **19** | -0.45 (0.10) | 0.84 | 0.80 | 0.75 |
| **26** | -0.61 (0.11) | 0.86 | 0.78 | 0.74 |
| *Disease perception* | **27** | 0.85 (0.06) | 1.11 | 1.12 | 0.32 |
| **21** | 0.54 (0.06) | 0.98 | 0.98 | 0.50 |
| **13** | 0.31 (0.06) | 0.90 | 0.90 | 0.40 |
| **20** | 0.19 (0.06) | 0.96 | 1.00 | 0.44 |
| **5** | -0.14 (0.07) | 0.85 | 0.85 | 0.60 |
| **8** | -0.23 (0.07) | 0.85 | 0.85 | 0.55 |
| **10** | -0.49 (0.07) | 0.97 | 0.91 | 0.51 |
| **11** | -0.51 (0.07) | 1.02 | 0.98 | 0.52 |
| - | **6** | -0.52 (0.07) | *1.52* | *1.61* | 0.08 |

**Table S4.**

| **Item**  **#** | **Item text** | **Intraclass correlation coefficient**  **(ICC)** |
| --- | --- | --- |
| 01 | I need to be treated with inhaled drugs forever | 0.62 |
| 02 | I believe that COPD tends to worsen over time | 0.58 |
| 04 | A regular administration of drugs allows me to move with less effort | 0.44 |
| 05 | I think that COPD is a mild disease since it is treated with inhaled drugs | 0.50 |
| 07 | I cannot easily accept to have COPD | 0.59 |
| 08 | Inhaled drugs are less effective than pills, tablets or other oral medications | 0.33 |
| 09 | Treatments for COPD must be taken regularly | 0.41 |
| 10 | I prefer to ignore COPD symptoms | 0.34 |
| 12 | A regular therapy reduces the risk of sudden worsening | 0.47 |
| 14 | Inhaled drugs help improving the fatigue in breathing | 0.42 |
| 15 | I am worried about my COPD | 0.64 |
| 18 | Spirometry is a fundamental examination for the COPD diagnosis | 0.50 |
| 19 | I will never heal from my COPD | 0.55 |
| 20 | I think I will never heal from my COPD because there is lack of effective drugs | 0.51 |
| 21 | I prefer not to think about my COPD | 0.50 |
| 22 | I am angry because of my COPD | 0.55 |
| 23 | Drugs for COPD improve my symptoms | 0.35 |
| 24 | I am having difficulty living with COPD symptoms | 0.54 |
| 25 | I wonder why COPD happened to me | 0.56 |
| 26 | COPD is a chronic disease and it is not possible to heal from it | 0.57 |

**Table S5.**

|  | | **<70 yrs** | **≥70 yrs** | **P-value** |
| --- | --- | --- | --- | --- |
| ***Disease acceptance*** | N | 145 | 241 | 0.2598** |
| Median  (25th-75th percentile) | 60.0  (40.0; 73.3) | 60.0  (40.0;80.0) |  |
| ***Awareness of treatment needs*** | N | 144 | 241 | 0.4020** |
| Median  (25th-75th percentile) | 83.3  (72.2;88.9) | 77.8  (66.7;88.9) |  |
| ***Disease knowledge*** | N | 148 | 243 | 0.7668** |
| Median  (25th-75th percentile) | 75.0  (58.3;91.7) | 75.0  (58.3;91.7) |  |
| ***Disease perception*** | N | 144 | 236 | 0.6809** |
| Median  (25th-75th percentile) | 66.7  (60.0;80.0) | 66.7  (53.3;76.7) |  |
| **DACQ total score** | N | 136 | 231 | 0.7935* |
| Mean (SD) | 69.5 (11.0) | 69.2 (11.4) |  |

**Table S6.**

|  | | **Male** | **Female** | **P-value** |
| --- | --- | --- | --- | --- |
| Disease acceptance | N | 289 | 97 | 0.2693** |
| Median  (25th-75th percentile) | 60.0  (40.0;80.0) | 53.3  (33.3;73.3) |  |
| ***Awareness of treatment needs*** | N | 288 | 97 | 0.6797** |
| Median  (25th-75th percentile) | 77.8  (66.7;88.9) | 83.3  (72.2;88.9) |  |
| ***Disease knowledge*** | N | 294 | 97 | 0.2612** |
| Median  (25th-75th percentile) | 75.0  (58.3;91.7) | 75.0  (66.7;91.7) |  |
| ***Disease perception*** | N | 282 | 98 | 0.6561** |
| Median  (25th-75th percentile) | 66.7  (53.3;73.3) | 66.7  (53.3;80.0) |  |
| **DACQ total score** | N | 274 | 93 | 0.8104* |
| Mean (SD) | 69.4 (11.5) | 69.1 (10.6) |  |

**Table S7.**

|  | | **Grade A** | **Grade B** | **Grade D** | **P-value** |
| --- | --- | --- | --- | --- | --- |
| ***Disease acceptance a*** | N | 68 | 244 | 38 | <0.0001^ |
| Mean (SD) | 71.3 (27.1) | 57.2 (24.1) | 38.8 (22.9) |  |
| ***Awareness of treatment needs b*** | N | 68 | 243 | 37 | 0.4991^ |
| Mean (SD) | 81.3 (13.7) | 79.2 (13.8) | 80.8 (13.1) |  |
| ***Disease knowledge c*** | N | 70 | 245 | 39 | 0.0007^ |
| Mean (SD) | 65.5 (21.9) | 73.7 (18.4) | 78.8 (16.3) |  |
| ***Disease perception d*** | N | 67 | 238 | 39 | 0.7120^ |
| Mean (SD) | 67.1 (18.0) | 65.2 (18.1) | 66.7 (16.8) |  |
| **DACQ total score e** | N | 65 | 231 | 36 | 0.0084^ |
| Mean (SD) | 73.1 (11.1) | 69.2 (11.1) | 66.5 (10.0) |  |

**Table S8.**

|  | | **CAT<10** | **CAT≥10** | **P-value** |
| --- | --- | --- | --- | --- |
| Disease acceptance | N | 94 | 292 | <0.0001** |
| Median  (25th-75th percentile) | 73.3  (60.0; 93.3) | 53.3  (33.3; 73.3) |  |
| ***Awareness of treatment needs*** | N | 93 | 292 | 0.0453** |
| Median  (25th-75th percentile) | 83.3  (72.2 94.4) | 77.8  (66.7; 88.9) |  |
| ***Disease knowledge*** | N | 96 | 295 | 0.0005** |
| Median  (25th-75th percentile) | 66.7  (50.0; 83.3) | 75.0  (58.3; 91.7) |  |
| ***Disease perception*** | N | 92 | 288 | 0.2487** |
| Median  (25th-75th percentile) | 66.7  (60.0; 80.0) | 66.7  (53.3; 73.3) |  |
| **DACQ total score** | N | 90 | 277 | 0.0004* |
| Mean (SD) | 73.0 (11.3) | 68.2 (11.0) |  |

## Reference

1. Wright BD, Linacre JM. Reasonable mean-square fit values. *Rasch Meas Trans.* 1994;8:370.
